# Supplementary material for: Brain activity associated with social exclusion overlaps with drug-related frontal-striatal circuitry in cocaine users: A pilot study
Source: PubMed Central journal article supplement — Neurobiol Stress. 2018 Oct 30;10:100137. doi: 10.1016/j.ynstr.2018.10.005 (PMC6430184; doi:10.1016/j.ynstr.2018.10.005), 2018-10-30
Supplement: mmc2.pdf [file mmc2.pdf]

**Supplemental Figure 1.** The relationship between gender, drug using group and brain reactivity to social exclusion versus inclusion. As an exploratory analysis we evaluated the relationship between gender and the brain response to social exclusion versus inclusion. The global mean signal change was extracted for each individual via whole brain voxel-wise calculation from within subject contrast maps of Exclusion and for Inclusion. The average and standard deviations of these global signal values were then compiled for all individuals in each of the four groups (cocaine using men, cocaine using women, control men, control women). A visual depiction of the rank order of the brain response to social ostracism is displayed wherein the effect sizes were largest for the cocaine using (D=0.94) and control women (0.89). While the cocaine using men (D=0.69) and control men (D=0.53) also had strong, but more modest changes in BOLD signal during Exclusion relative to Inclusion.

## Ranked Response To Social Exclusion vs Inclusion

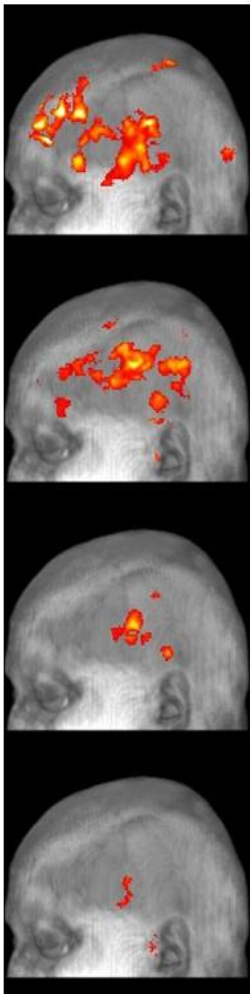

| Cocaine Using Women    |                   |
|------------------------|-------------------|
| Inclusion ( $\beta$ )  | 0.014             |
| Exclusion ( $\beta$ )  | 0.26              |
| <b>Effect Size (D)</b> | <b>0.94 LARGE</b> |

| Control Women          |                   |
|------------------------|-------------------|
| Inclusion ( $\beta$ )  | 0.07              |
| Exclusion ( $\beta$ )  | 0.31              |
| <b>Effect Size (D)</b> | <b>0.89 LARGE</b> |

| Cocaine Using Men      |                   |
|------------------------|-------------------|
| Inclusion ( $\beta$ )  | 0.03              |
| Exclusion ( $\beta$ )  | 0.21              |
| <b>Effect Size (D)</b> | <b>0.68 LARGE</b> |

| Control Men            |                    |
|------------------------|--------------------|
| Inclusion ( $\beta$ )  | 0.11               |
| Exclusion ( $\beta$ )  | 0.34               |
| <b>Effect Size (D)</b> | <b>0.53 MEDIUM</b> |
